# Supplementary material
Source: publisher site journal article supplement (https://www.dovepress.com/article/546857)
Supplement: Supplementary file 1 [file 546857%20Revised%20%2509Supplementary%20Material_.docx]

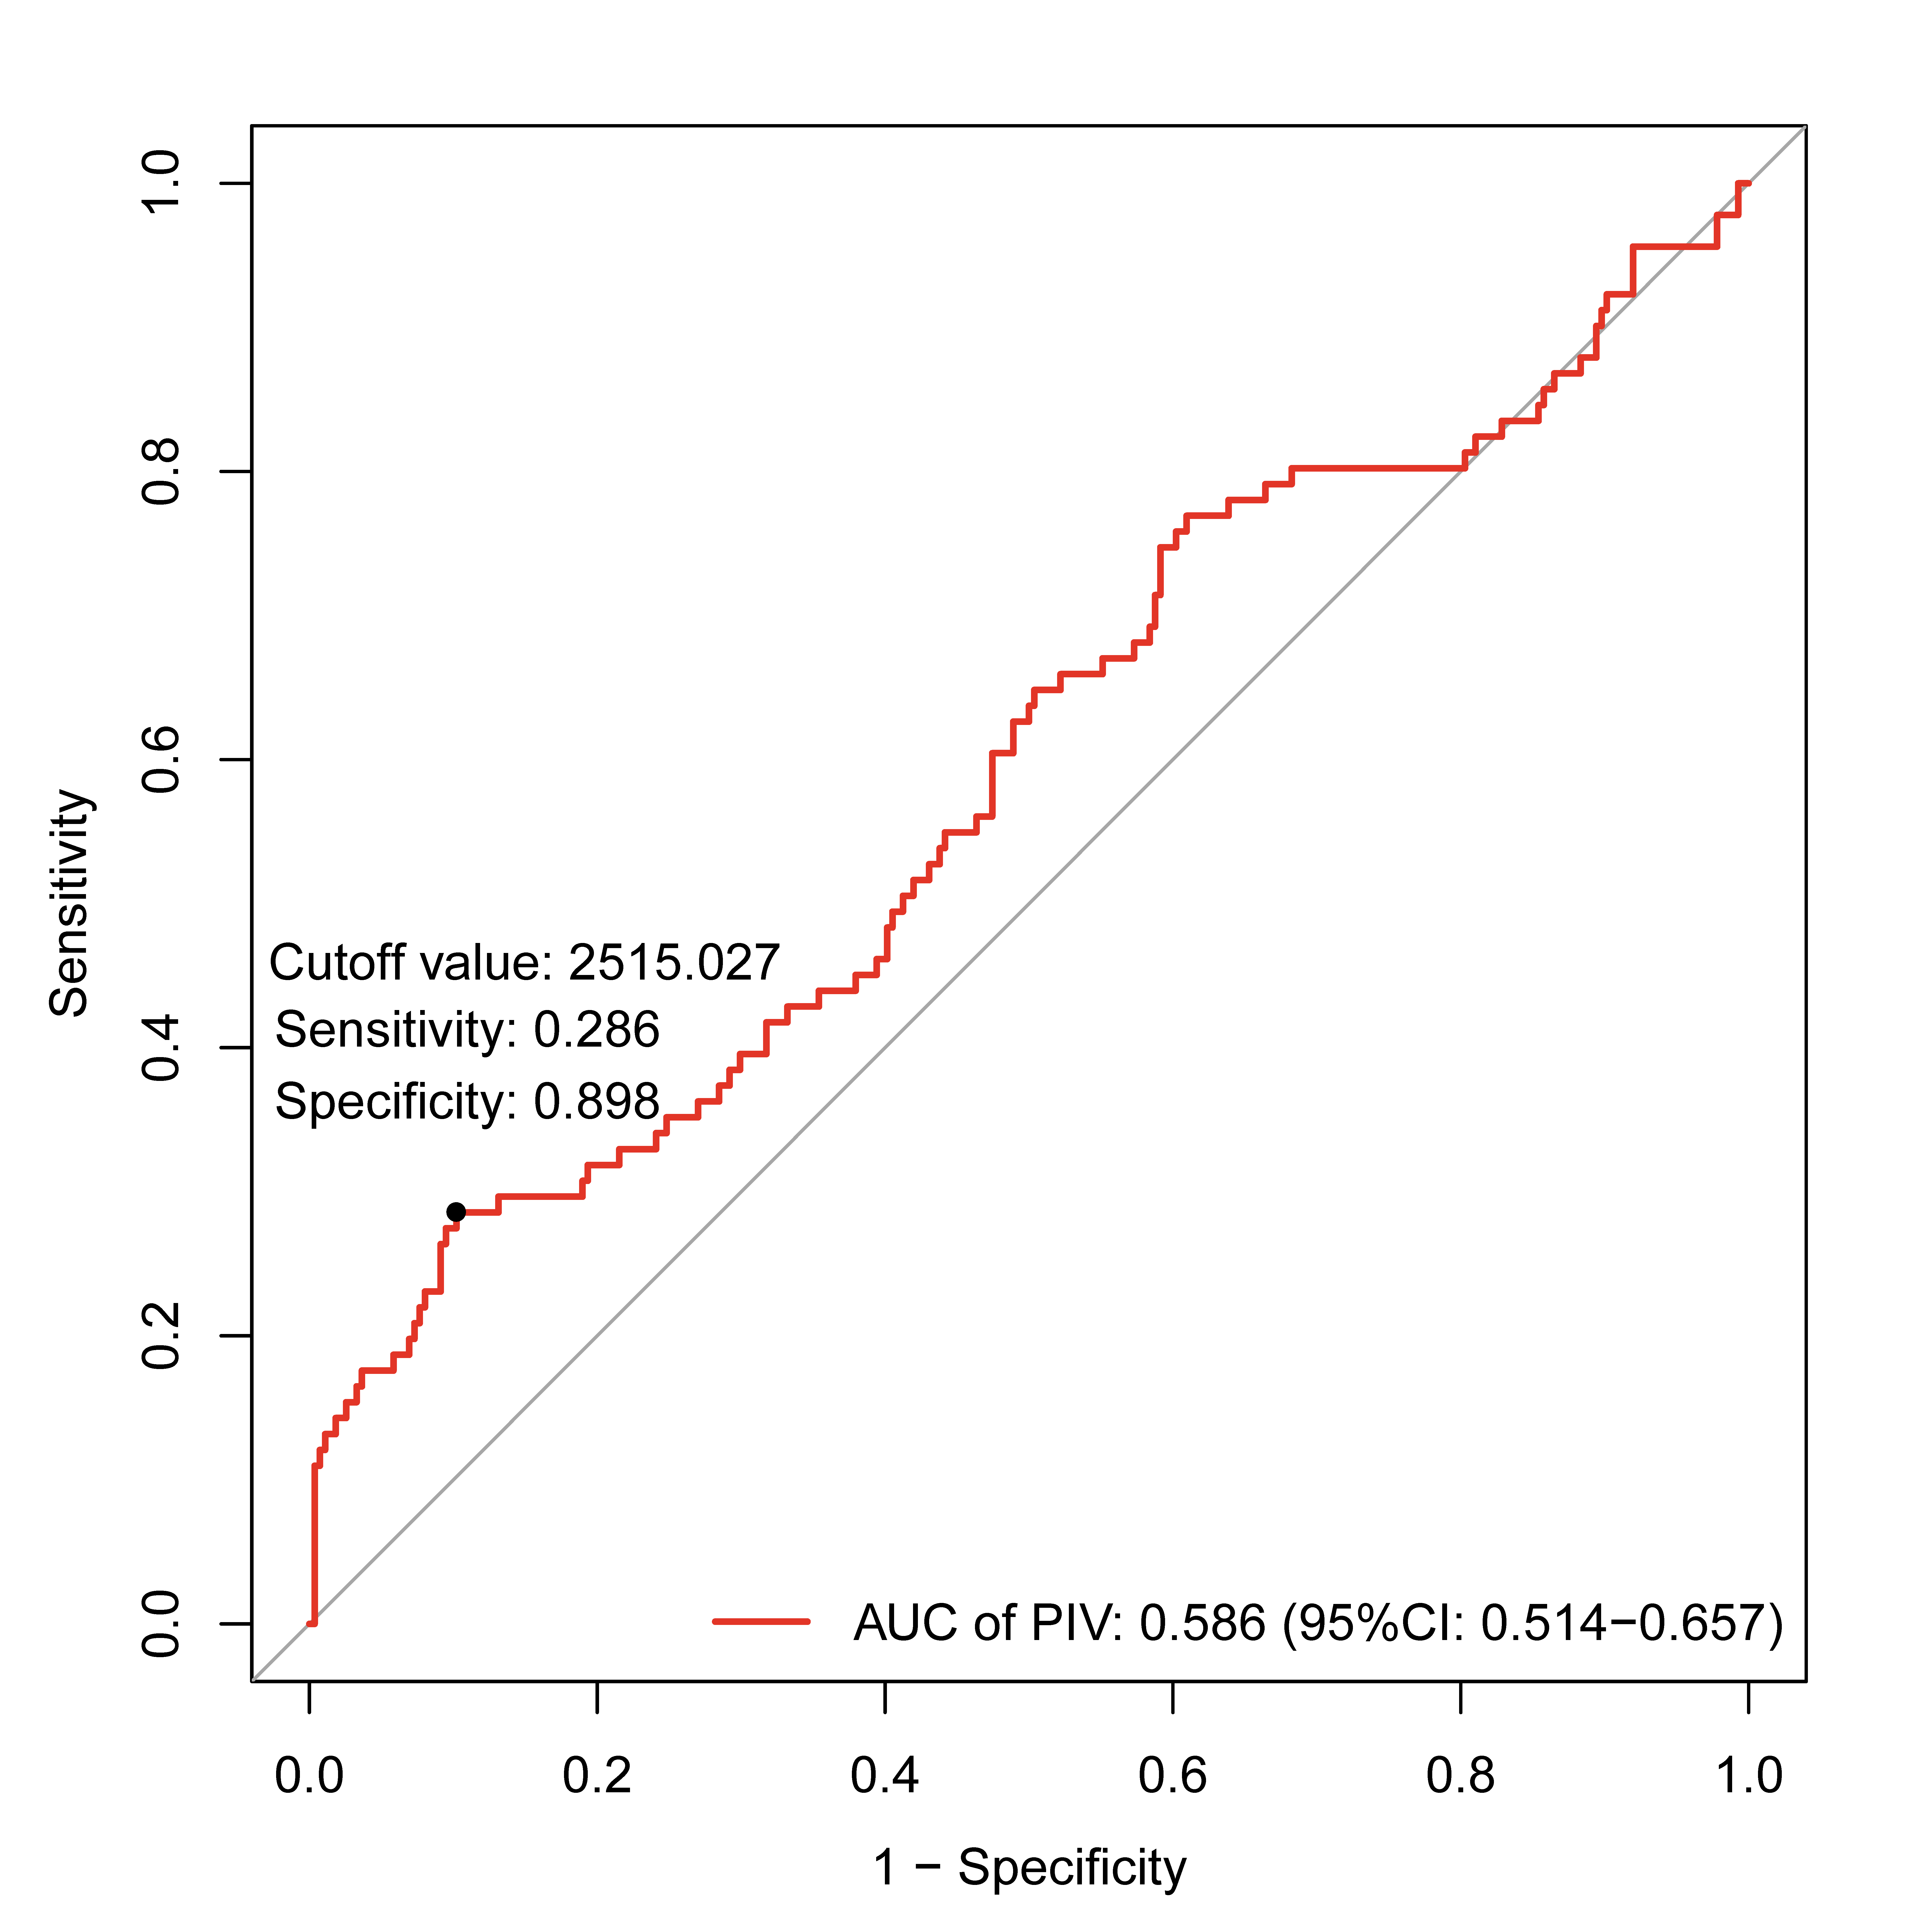


**Figure S1** Identification of the best cut-off point of the PIV.

**Abbreviations:** PIV, Pan-immune inflammation value; AUC, Area under curve; CI, Confidence interval.





**Figure S2** Constructing a correlation matrix of significant variables from univariate logistic regression to assess multicollinearity.

**Abbreviations:** CRP, C-reactive protein; D-D, D-dimer; ALB, albumin; PaCO2, partial pressure of carbon dioxide; PIV, Pan-immune inflammation value.
